# Supplementary material for: Mechanism of kinetin-induced death of Vicia faba ssp. minor cortex cells
Source: Research Square preprint supplement (doi:10.21203/rs.3.rs-226515/v1), 2021-03-01
Supplement: Supplementary file 1 [file b8ff4810c2cb16e1bc8f59ff.docx]

|  | | **Factor/concentration** | | **Destination** | **Origin** | |
| --- | --- | --- | --- | --- | --- | --- |
| 1. **1.** | 6-(2-hydroxy-3-methylbenzylamino purine (PI-55) **– 5 and 10 µM** | | Inhibitor of cytokinin receptors | | | Laboratory of Growth Regulators, Palacký University |
| 1. **2.** | Kinetin (Kin) – **46 µM** | | inducer of cell death in root cortex cells | | | Sigma-Aldrich Company |
| 1. **3.** | Adenine (Ad) **– 50 and 100 µM** | | inhibitor of adenine phosphoribosyl transferase (APRT) | | | Sigma-Aldrich Company |
| 1. **4.** | 5'-amino-5'-deoxyadenosine (Ado) **– 10 and 50 µM** | | inhibitor adenosine kinases (ADK) | | | Sigma-Aldrich Company |
| 1. **5.** | N-(2-chloro-4-piridylo)-N’-phenylurea (CPPU) **– 5 and 10 µM** | | inhibitors CK oxidases | | | Sigma-Aldrich Company |
| 1. **6.** | Cyclosporine (CsA) – **5 and 25 µM** | | blocker of mitochondria membrane calcium channels | | | Sigma-Aldrich Company |
| 1. **7.** | Ethylene glycol-bis(β-aminoethyl ether)-N,N,N’,N’-tetra-acetic acid (EGTA) – **10 and 50** µM | | blocker of all membrane calcium channels | | | Sigma-Aldrich Company |
| 1. **8.** | Lanthanum chloride (LaCl3) – **5 and 25 µM** | | blocker of endoplasmic reticulum membrane calcium channels | | | Sigma-Aldrich Company |
| 1. **9.** | Kinetin (Kin) – **46 µM** | | inducer of cell death in root cortex cells | | | Sigma-Aldrich Company |
| **10.** | Sorafenib ­ **1 µM** | | RAF kinase inhibitor | | | Selleckchem |
| **11.** | Mek2 ­ **1 µg per 1 ml** | | MEK2 kinase substrate | | | Selleckchem |
| **12**. | Syntide **1 µg per 1 ml** | | RAF kinase substrate | | | Selleckchem |

**Table 1.** The types and concentrations as well as experimental destination and origin of the modulator of cytokinin reception and metabolism as well as blocker of calcium ions channels and inhibitor Raf-like kinase activates and RAF and MEK2 substrate applied in the studies.
